# Supplementary material
Source: PubMed Central journal article supplement (PMC4461434)
Supplement: NIHMS693046-supplement.pdf [file NIHMS693046-supplement.pdf]

## Supplemental Information

### I. Cellular Cytotoxicity Assay

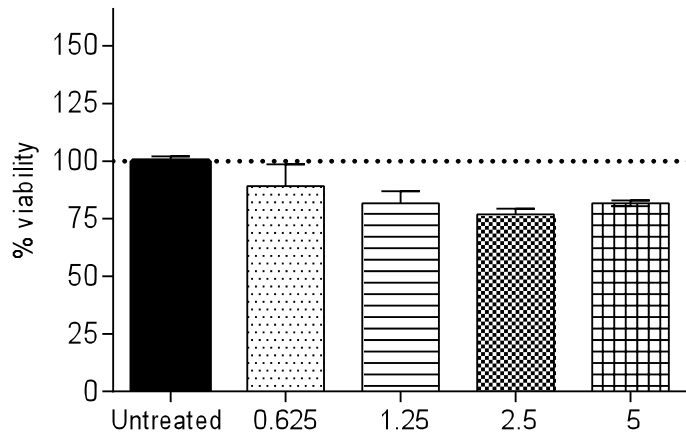

**Figure 1S. Curc-np induce minimal cytotoxicity of keratinocytes.** PAM212 keratinocytes were incubated with a range of curc-np concentrations (0.625-5mg/ml) and analyzed for metabolic activity using fluorescein diacetate (FDA) assay. After 24 hours, curc-np 0.625 mg/ml treated cells showed no significant difference compared to untreated control ( $p > 0.05$ ), while curc-np 5mg/ml treated cells exhibited 81.7% viability compared to untreated control ( $p \leq 0.005$ , Student's *t*-test). Data are expressed by mean percentage as compared to untreated cells and are composite of three independent experiments  $\pm$ SEM.

### II. Keratinocyte Migration Assay

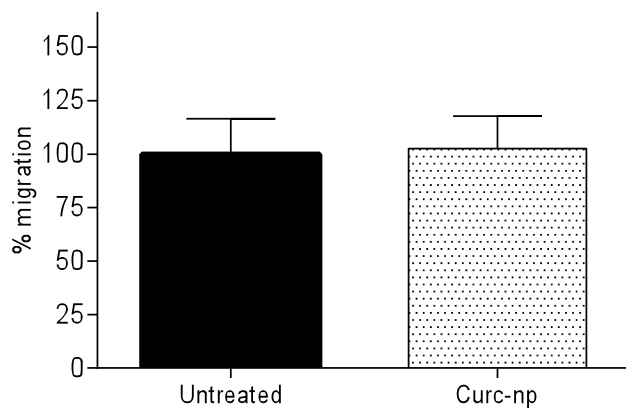

**Figure 2S. Curc-np does not influence ke ratinocyte migration.** No significant difference in relative wound area recovery was observed between untreated and curc-np-treated keratinocytes at 24 hours post-administration of scratch to cell monolayer ( $p > 0.05$ , Student's *t*-test). Data is a composite of three independent experiments. Error bars denote SEM.
